# Supplementary material
Source: publisher figshare collection journal article supplement (https://gsajournals.figshare.com/articles/dataset/_/7906109)
Supplement: Supplementary file 1 [file 1]

## Supplementary Tables

**Table S1:** Credible set sizes from the three fine-mapping methods, across datasets with different genotyping or imputation strategies. The sizes of the credible sets are roughly the same across all the methods and datasets.

| Method         | Mean SNPs/set | Median SNPs/set | 95% quantile |
|----------------|---------------|-----------------|--------------|
| J-test LBC-1KG | 5             | 1               | 16           |
| J-test LBC-HRC | 5             | 1               | 19           |
| J-test LBC-WGS | 4             | 1               | 14           |
| BIMBAM LBC-1KG | 6             | 2               | 21           |
| BIMBAM LBC-HRC | 6             | 2               | 23           |
| BIMBAM LBC-WGS | 5             | 1               | 20           |
| BSLMM LBC-1KG  | 5             | 2.5             | 14           |
| BSLMM LBC-HRC  | 5             | 2               | 15           |
| BSLMM LBC-WGS  | 4             | 1               | 10           |

**Table S2:** The mean non-reference discordance rate (NRD) in genotypes between the whole genome sequence, and the genotyped and imputed SNPs, for all common SNPs in the genome (MAF>0.1).

| Dataset | Mean NRD<br>for Genotyped SNPs | Mean NRD<br>for Imputed SNPs |
|---------|--------------------------------|------------------------------|
| LBC-HRC | 0.4%                           | 1.6%                         |
| LBC-1KG | 0.4%                           | 3.2%                         |

**Table S3:** Fine-mapping results from 1000 replicates of three simulated traits, using two datasets.

The coverage of the causal variant reaches approximately 95% in all of the cases. Demonstrating that the three fine-mapping methods work as expected under ideal conditions. Comparing the size of the sets we see that the three methods all perform generally on par with one another.

**(a)**  $h^2 = 0.2$ 

|            | Method | Coverage | Mean SNPs/set | Median SNPs/set | 95% quantile |
|------------|--------|----------|---------------|-----------------|--------------|
| $N = 3781$ | J-Test | 97%      | 7             | 1               | 31           |
|            | BIMBAM | 97%      | 5             | 2               | 20           |
|            | BSLMM  | 97%      | 6             | 2               | 22           |
| $N = 1366$ | J-Test | 95%      | 15            | 3               | 48           |
|            | BIMBAM | 97%      | 10            | 4               | 38           |
|            | BSLMM  | 97%      | 13            | 4               | 38           |

**(b)**  $h^2 = 0.1$ 

|            | Method | Coverage | Mean SNPs/set | Median SNPs/set | 95% quantile |
|------------|--------|----------|---------------|-----------------|--------------|
| $N = 3781$ | J-Test | 97%      | 19            | 3               | 57           |
|            | BIMBAM | 97%      | 10            | 3               | 35           |
|            | BSLMM  | 97%      | 13            | 3               | 44           |
| $N = 1366$ | J-Test | 94%      | 20            | 7               | 80           |
|            | BIMBAM | 96%      | 16            | 7               | 61           |
|            | BSLMM  | 95%      | 17            | 8               | 64           |

**(c)**  $h^2 = 0.05$ 

|            | Method | Coverage | Mean SNPs/set | Median SNPs/set | 95% quantile |
|------------|--------|----------|---------------|-----------------|--------------|
| $N = 3781$ | J-Test | 96%      | 19            | 6               | 78           |
|            | BIMBAM | 97%      | 14            | 6               | 50           |
|            | BSLMM  | 97%      | 15            | 6               | 61           |
| $N = 1366$ | J-Test | 96%      | 33            | 12              | 108          |
|            | BIMBAM | 97%      | 23            | 11              | 79           |
|            | BSLMM  | 97%      | 28            | 11              | 87           |
