# Supplementary material
Source: publisher figshare collection journal article supplement (https://gsajournals.figshare.com/articles/dataset/_/7906109)
Supplement: Supplementary file 2 [file 1]

## Supplementary Figures

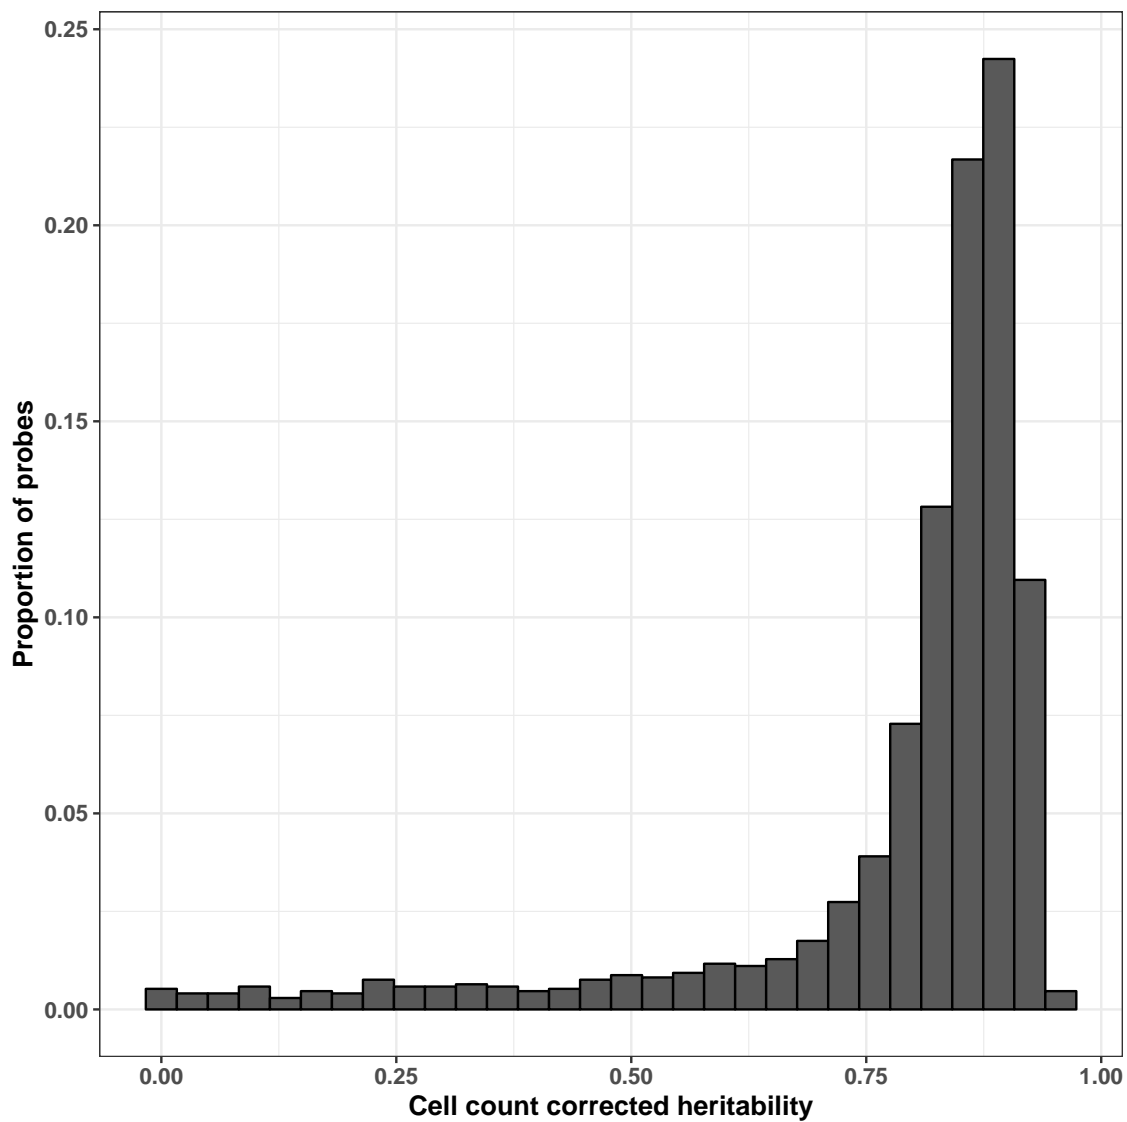

**Figure S1:** The distribution of heritabilities of the DNA methylation level at the CpG-SNP probes as calculated by (McRae et al., 2014) in a family based study design. The median  $h^2 \sim 0.86$ .

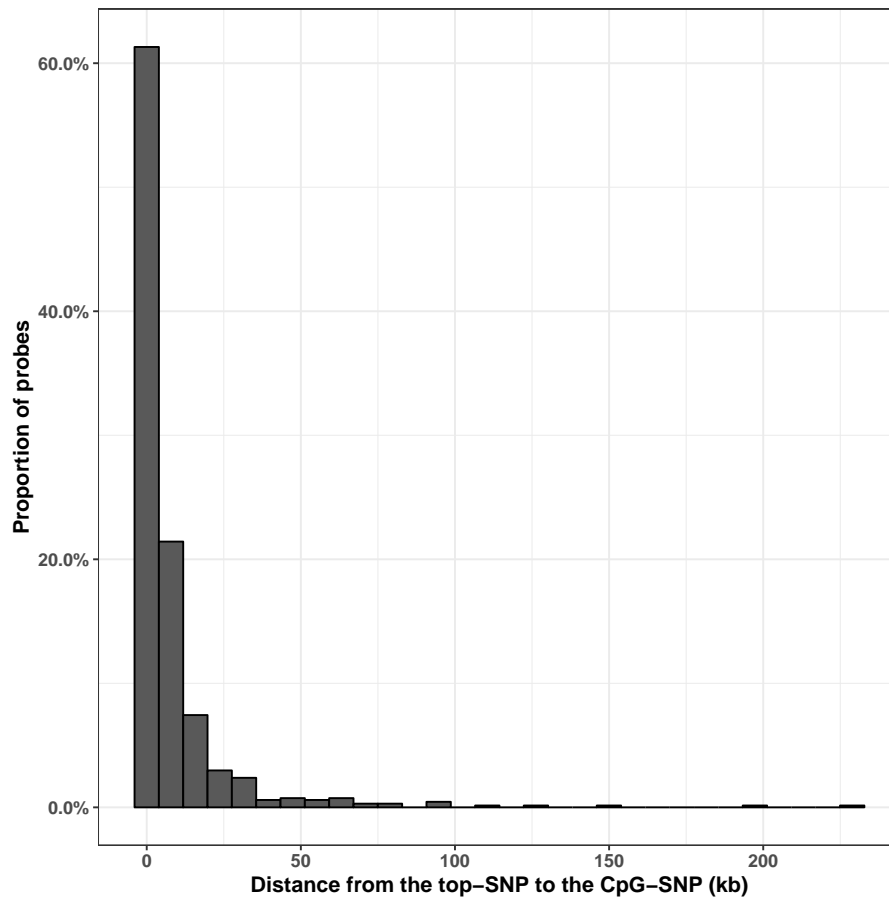

**Figure S2:** The distribution of distance between the CpG-SNP and the top-SNP in the GWAS using the WGS dataset, in the 672 cases where the CpG-SNP is not the top-SNP. The mean distance is 8kb, the median distance is 2kb, and the 95% quantile is 34kb.

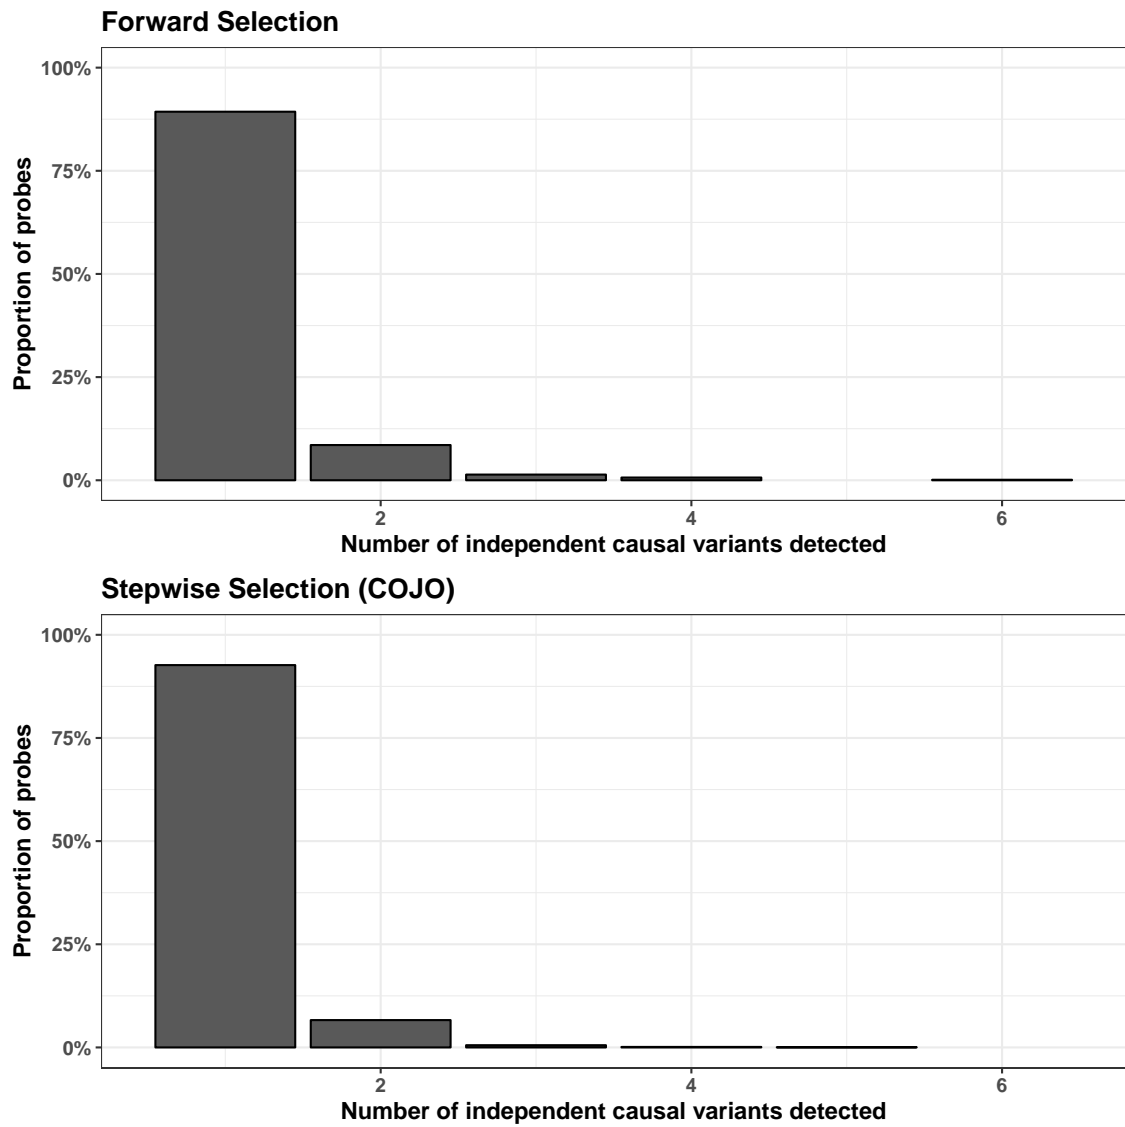

**Figure S3:** The estimated number of causal variants at each CpG-site using a forward selection method, and a stepwise selection using the Conditional and Joint model (CoJo) (Yang et al., 2012). Multiple signals were detected in 11% of the mQTL from at least one of methods.

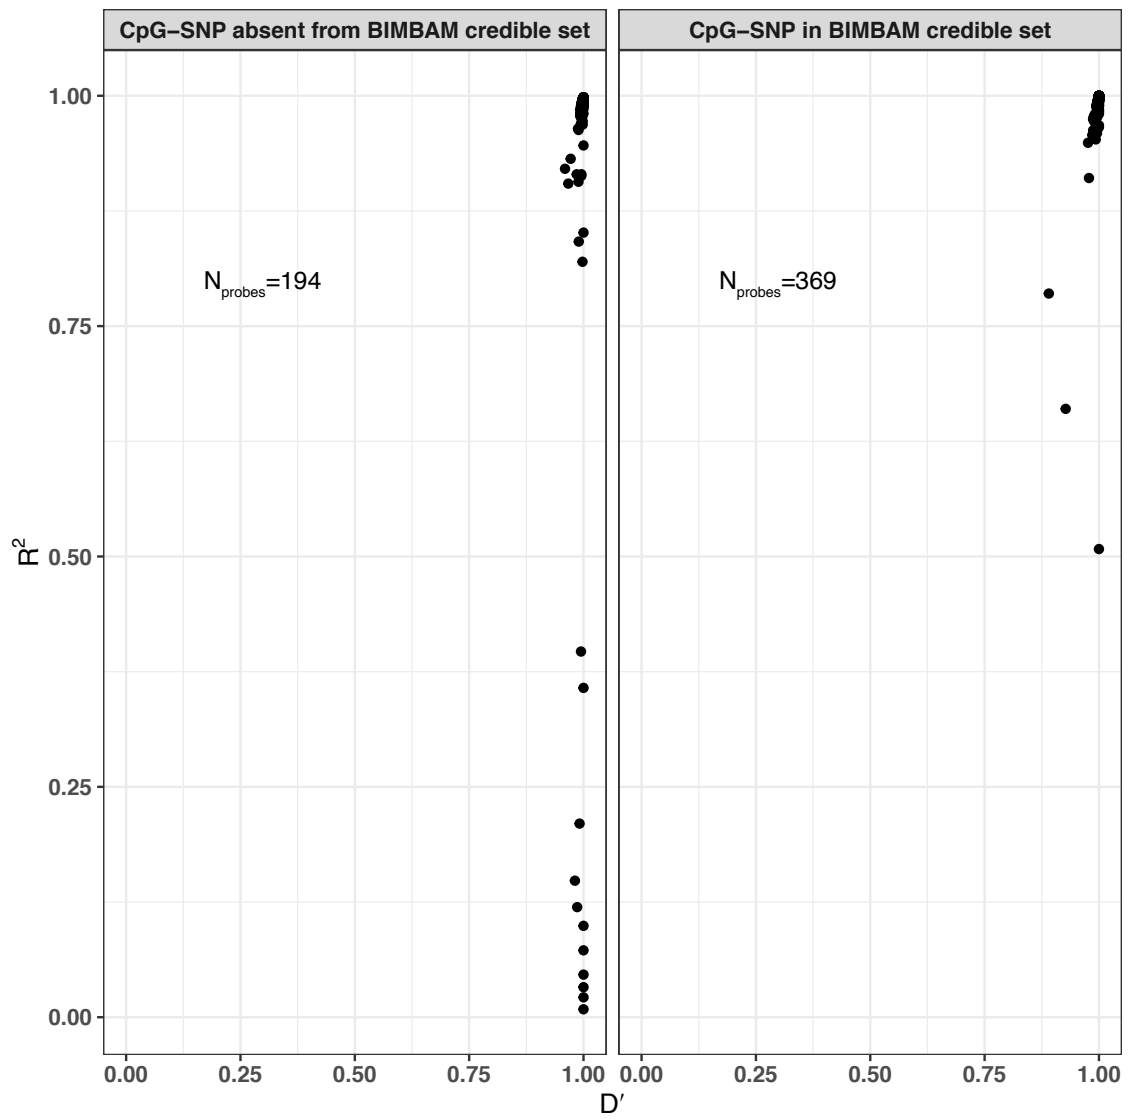

**Figure S4:** The LD  $D'$  vs LD  $R^2$  of the top-SNP vs the CpG-SNP for the probes with a single independent signal in the conditional analyses, and a top-SNP different to the CpG-SNP.

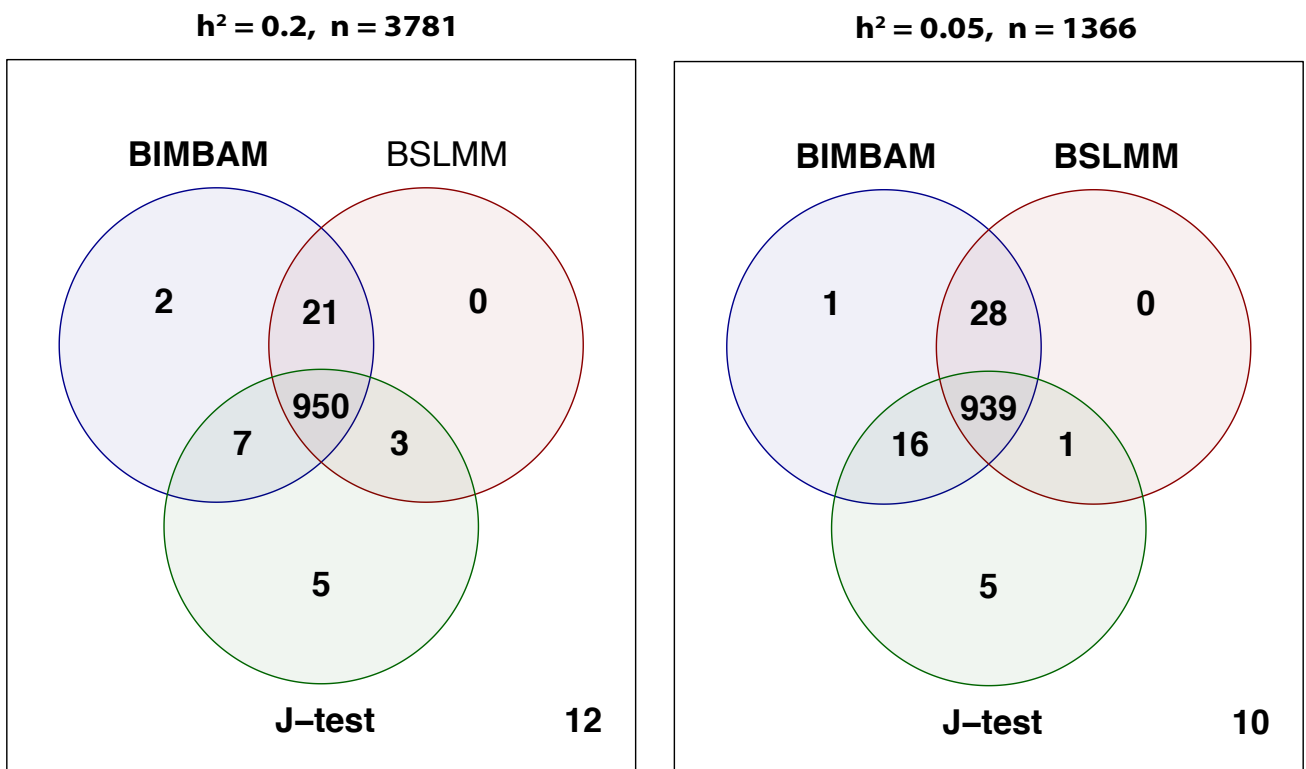

**Figure S5:** The overlap in the simulated causal variants included in the 95% credible sets from each method, in two of the simulation scenarios. Here we show the results from the simulation with highest effect size ( $h^2 = 0.2$ ) and largest sample size ( $n=3781$ ), and results from the simulation with the lowest effect size ( $h^2 = 0.05$ ) and smallest sample size ( $n=1366$ )
